# Supplementary material for: Novel tunable super-tough materials from biodegradable polymer blends: nano-structuring through reactive extrusion
Source: PubMed Central journal article supplement — RSC Adv. 2019 Jan 21;9(5):2836–47. doi: 10.1039/c8ra09596e (PMC9060287; doi:10.1039/c8ra09596e), 2019-01-21
Supplement: RA-009-C8RA09596E-s001.pdf [file RA-009-C8RA09596E-s001.pdf]

## Novel Tunable Super-Tough Material from Biodegradable Polymer Blends: Nano-structuring through Reactive Extrusion

Feng Wu <sup>1,2</sup>, Manjusri Misra <sup>1,2</sup>, Amar K. Mohanty <sup>1,2,\*</sup>

<sup>1</sup>Bioproduct Discovery and Development Centre, Department of Plant Agriculture, University of Guelph, Crop Science Building, Guelph, ON N1G 2W1, Ontario, Canada

<sup>2</sup>School of Engineering, University of Guelph, Thornbrough Building, Guelph, ON N1G 2W1, Ontario, Canada

Corresponding authors:

\*E mail: Amar K. Mohanty: [mohanty@uoguelph.ca](mailto:mohanty@uoguelph.ca)

### Fig. S1 – S4

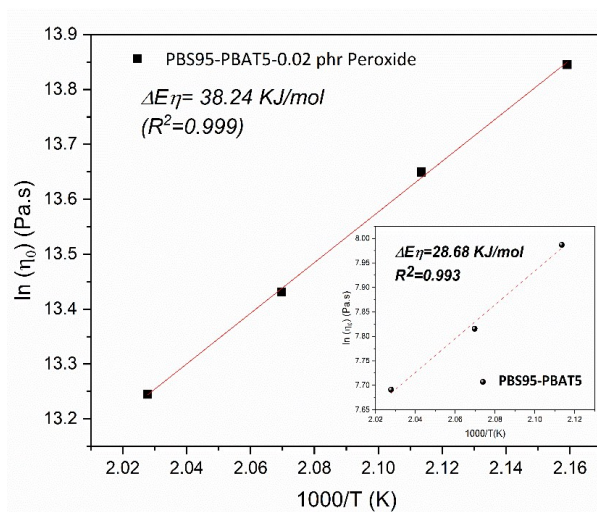

Figure S1. The Arrhenius plot of the zero shear viscosity of the nano and micro-blending samples as a function of temperature

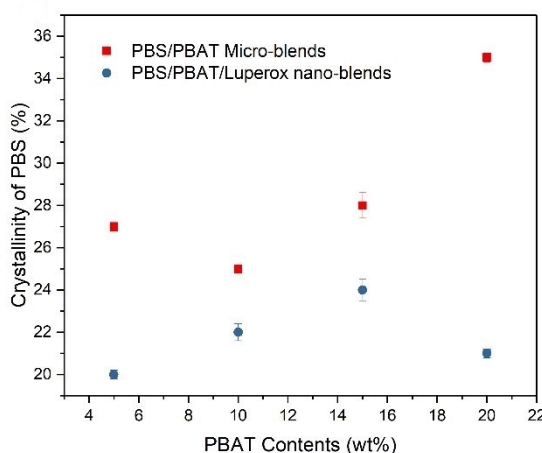

Figure. S2 The dependence of the crystallinity of the blends on PBAT contents for the micro and nano-blends

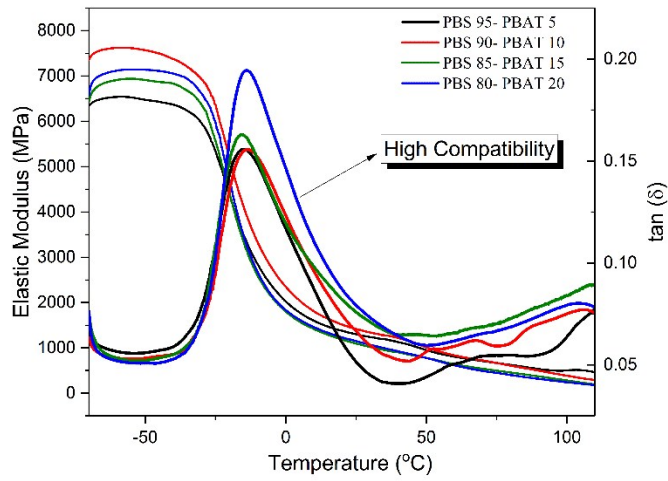

Figure S3. The DMA curves of PBS/PBAT blends measured in dual-cantilever model

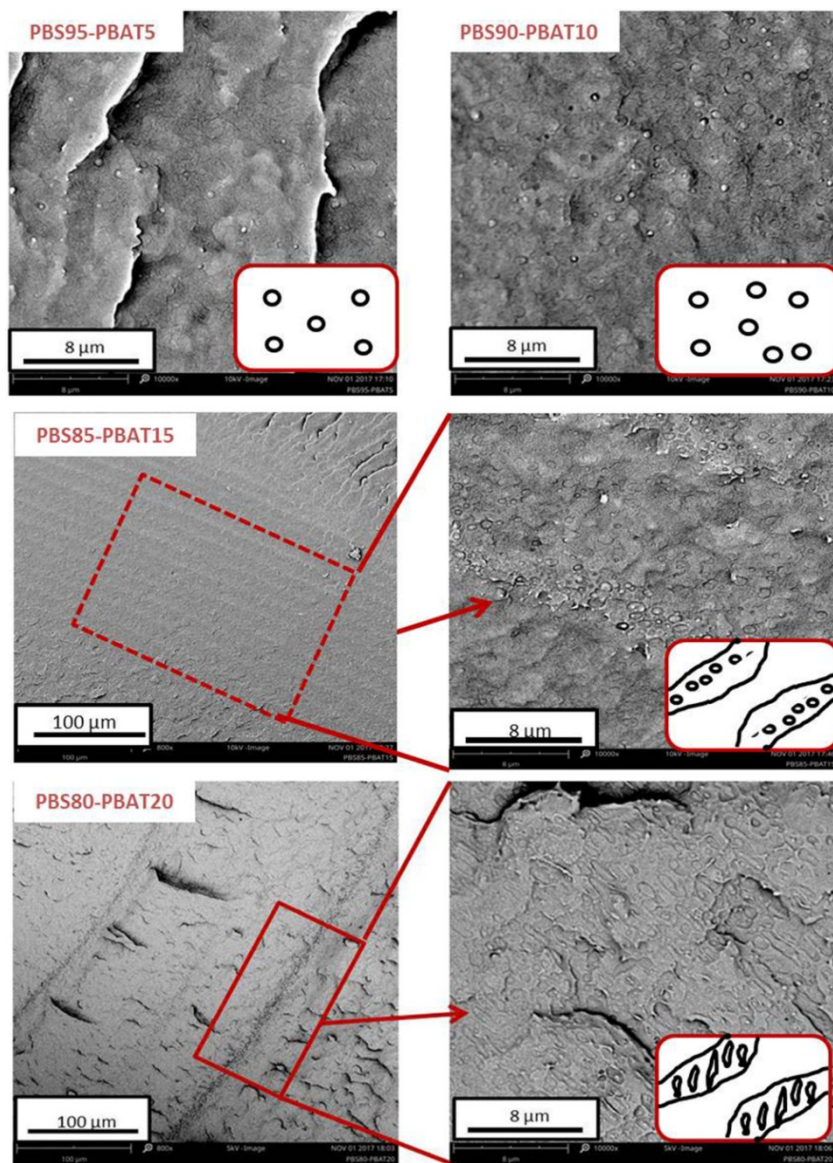

Figure S4 Morphology evolution of the immiscible PBS-PBAT blends with increasing PBAT contents observed by SEM

**Table S1-S2**

Table S1 The gel contents of the PBS/PBAT nano-blends after extracted in chloroform

| Samples                       | Gel contents (wt%) |
|-------------------------------|--------------------|
| PBS 95/ PBAT5 Luperox 0.02    | 15.8               |
| PBS 90/ PBAT 10/ Luperox 0.02 | 6.1                |
| PBS 85/ PBAT 15/ Luperox 0.02 | 0.96               |
| PBS 80/ PBAT 20/ Luperox 0.02 | 0                  |

Table S2 The mechanical properties of the pure PBS and PBAT

| Samples | Tensile modulus (MPa) | Tensile strength (MPa) | Elongation at yield (%) | Elongation at break (%) | Notched Impact Strength (J/m) |
|---------|-----------------------|------------------------|-------------------------|-------------------------|-------------------------------|
| PBS     | 613 ± 23.2            | 48.7 ± 2.36            | 17.9 ± 0.4              | 267.3 ± 24.5            | 79 ± 28.8                     |
| PBAT    | 70 ± 7.5              | 27.6 ± 1.9             | 23.2 ± 0.8              | 574.4 ± 53.3            | Non-break                     |
